# Supplementary material for: Identification of Four Oxidative Stress‐Responsive MicroRNAs, miR‐34a‐5p, miR‐1915‐3p, miR‐638, and miR‐150‐3p, in Hepatocellular Carcinoma
Source: Hindawi journal article supplement (doi:10.1155/2017/5189138), 2017-01-01
Supplement: f1 [file 5189138.f1.pdf]

## Supplementary Tables

**Table S1 Characteristics of studies included for meta-analysis of hydrogen peroxide-responsive miRNAs**

| Author (year)   | Species | Cell type                  | H <sub>2</sub> O <sub>2</sub> treatment |       | Ref. |
|-----------------|---------|----------------------------|-----------------------------------------|-------|------|
|                 |         |                            | Concentration                           | Time  |      |
| Lin (2009)      | Mouse   | VSMCs                      | 200µM                                   | 6h    | [5]  |
| Maes (2009)     | Human   | WI-38 fibroblasts          | 200µM                                   | NA    | [6]  |
| Magenta (2011)a | Human   | HUVECs                     | 200µM                                   | 8h    | [7]  |
| Magenta (2011)b | Human   | HUVECs                     | 200µM                                   | 24h   | [7]  |
| Mateescu (2011) | Mouse   | Fibroblasts                | 400µM                                   | 24h   | [8]  |
| Xu (2012)       | Mouse   | Neuron                     | 200µM                                   | 6h    | [9]  |
| Howell (2013)   | Human   | ARPE-19                    | 200µM                                   | 18h   | [10] |
| Jong (2013)     | Human   | HUVECs                     | 200µM                                   | 2hx2d | [11] |
| Kim (2014)      | Human   | Human dermal papilla cells | 750µM                                   | 24h   | [12] |
| Cross (2015)    | Human   | CRL-1584                   | 25µM                                    | 4h    | [13] |
| Luo (2016)      | Human   | HepG2                      | 600µM                                   | 24h   | [14] |

VSMC: vascular smooth muscle cells; HUVEC: human umbilical vein endothelial cells; NA, not available.
